# Supplementary figures and images for: Highly Stable and Active Pt/Nb-TiO2Carbon-Free Electrocatalyst for Proton Exchange Membrane Fuel Cells
Source: Hindawi journal article supplement (doi:10.1155/2012/389505), 2012-01-01

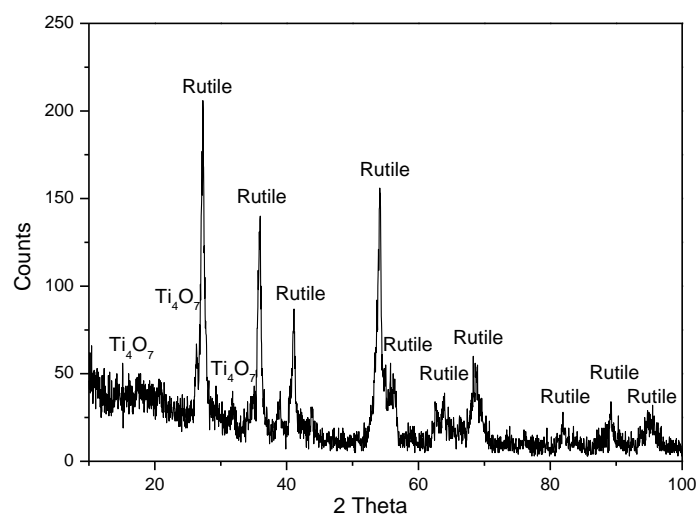

**Figure S1.** XRD patterns of Nb-TiO<sub>2</sub> sphere support.

Supplement: f1 [file 389505.f1.pdf]
